# Supplementary material for: An endemic pathway to sheep and goat domestication at Aşıklı Höyük (Central Anatolia, Turkey)
Source: PubMed Central journal article supplement — Proc Natl Acad Sci U S A. 2022 Jan 18;119(4):e2110930119. doi: 10.1073/pnas.2110930119 (PMC8795544; doi:10.1073/pnas.2110930119), 2022-01-18
Supplement: pnas.2110930119.sapp.pdf [file pnas.2110930119.sapp.pdf]

## Supplementary Information for

**An Endemic Pathway to Sheep and Goat Domestication at Aşıklı Höyük (Central Anatolia, Turkey)**

Mary C. Stiner\*, Natalie D. Munro, Hijlke Buitenhuis, Güneş Duru, and Mihriban Özbaşaran

\*Corresponding author: Mary C. Stiner, Email: [mstiner@arizona.edu](mailto:mstiner@arizona.edu)

### **This PDF file includes:**

SI Figures S1 to S5

SI Tables S1 to S10

SI Supplementary text:

*Background on pelvic morphology, fusion and sex determination*

*Background and results on caprine body size variation*

SI References

**Table S1.** Relative abundance of major prey groups by level in the post-2009 sample as (a) NISP and (b) percentages and Inverse of Simpson’s diversity index (1/D).

a. NISP for major prey groups:

| Prey group | Level 5 | Level 4-low | Level 4 | Level 3 | Level 2J-D |
|------------|---------|-------------|---------|---------|------------|
| Fish       | 606     | 465         | 1617    | 477     | 56         |
| Hedgehog   | 41      | 19          | 154     | 17      | 3          |
| Chelonian  | 159     | 85          | 344     | 180     | 21         |
| Hare       | 1630    | 989         | 3909    | 1284    | 543        |
| Equidae    | 92      | 27          | 383     | 213     | 136        |
| Cervidae   | 109     | 76          | 161     | 203     | 123        |
| Aurochs    | 658     | 198         | 1124    | 491     | 416        |
| Pig        | 315     | 140         | 523     | 343     | 305        |
| Caprines   | 1374    | 523         | 5761    | 6817    | 6873       |
| Birds      | 46      | 20          | 151     | 104     | 33         |
| Total NISP | 5030    | 2542        | 14,127  | 10,129  | 8509       |

b. Percent of total NISP for major prey groups and 1/D:

| Prey group           | %, Lev 5 | %, Lev 4-low | %, Lev 4 | %, Lev 3 | %, Lev 2J-D |
|----------------------|----------|--------------|----------|----------|-------------|
| Fish                 | 12       | 18.3         | 11.4     | 4.7      | 0.7         |
| Hedgehog             | 0.8      | 0.7          | 1.1      | 0.2      | 0           |
| Chelonian            | 3.2      | 3.3          | 2.4      | 1.8      | 0.2         |
| Hare                 | 32.4     | 38.9         | 27.7     | 12.7     | 6.4         |
| Equidae              | 1.8      | 1.1          | 2.7      | 2.1      | 1.6         |
| Cervidae             | 2.2      | 3            | 1.1      | 2        | 1.4         |
| Aurochs              | 13.1     | 7.8          | 8        | 4.8      | 4.9         |
| Pig                  | 6.3      | 5.5          | 3.7      | 3.4      | 3.6         |
| Caprines             | 27.3     | 20.6         | 40.8     | 67.3     | 80.8        |
| Birds                | 0.9      | 0.8          | 1.1      | 1        | 0.4         |
| Total NISP           | 5030     | 2542         | 14,127   | 10,129   | 8509        |
| 1/D with caprines    | 4.608    | 4.202        | 3.773    | 2.033    | *1.443      |
| 1/D without caprines | 3.707    | 3.216        | 3.450    | 4.638    | 4.466       |

Notes: Because the boundary between lower level 4 and upper 5 is unclear, Level 4 is partitioned to include subset “4 low” for analysis. (\*) this calculation used a large sample from 2J-D that includes material from the old excavations.

**Table S2.** Test of probable (worst case scenario\*) recovery biases of pre-2009 excavation campaigns at AH, based on a comparison of the taxonomic contents and small skeletal elements (toe bones and teeth) recovered from the coarse versus fine fractions from post-2009 excavation units in Level 4 (Area 4GH). Fine fraction material was recovered using a combination of 4 mm and 2 mm dry sieve mesh and flotation techniques.

| Taxon or skeletal element    | % in coarse fraction | % in fine fraction | total NISP |
|------------------------------|----------------------|--------------------|------------|
| Tortoise/turtle (Chelonians) | 4                    | 96                 | 44         |
| Fish                         | 0                    | 100                | 108        |
| Hare                         | 17                   | 83                 | 215        |
| Other small mammals          | 10                   | 90                 | 59         |
| Small carnivores             | 24                   | 76                 | 21         |
| Birds (large & small)        | 37                   | 63                 | 8          |
| Small-medium ungulates       | 42                   | 58                 | 846        |
| Large ungulates              | 64                   | 36                 | 44         |
| Very large ungulates         | 88                   | 12                 | 51         |
| Permanent teeth              | 43                   | 57                 | 68         |
| Deciduous teeth              | 26                   | 74                 | 23         |
| 1st phalanx                  | 22                   | 78                 | 59         |
| 2nd phalanx                  | 17                   | 83                 | 30         |
| 3rd phalanx                  | 27                   | 73                 | 15         |

(\*) The potential impact of differential recovery on species representation is much less severe in Level 2, however, because these faunas overwhelmingly contain caprine remains rather than rich mixes of large and small species (as opposed to Levels 5-4).

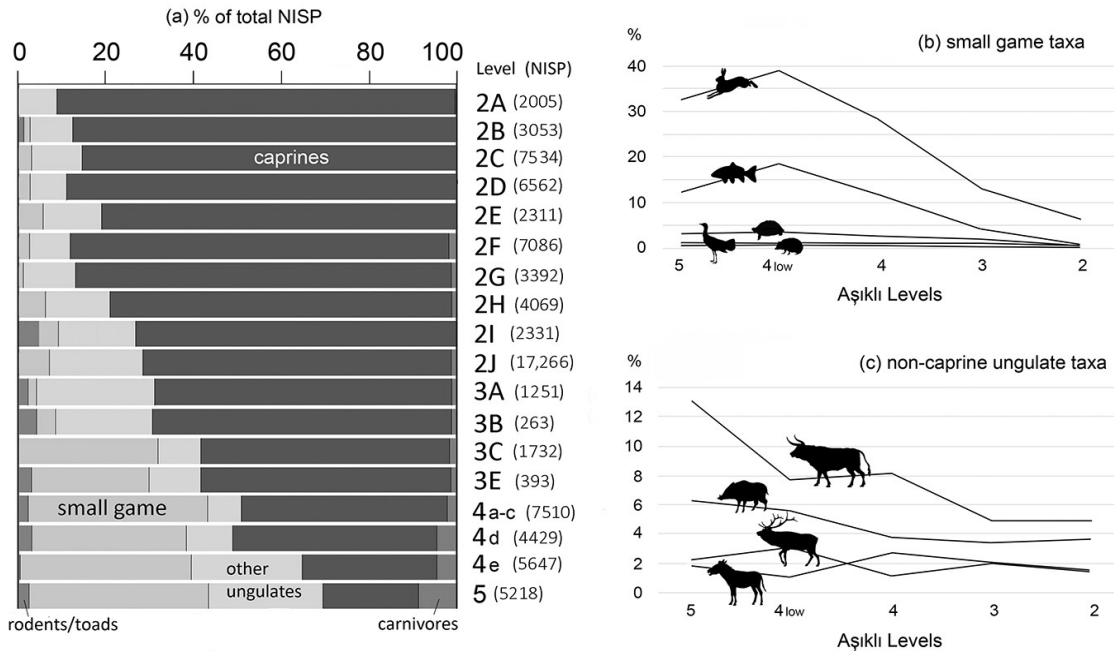

**Figure S1.** Trends in the importance of prey groups from Level 5 through Level 2 at AH based on counts of NISP: (a) variation in the representation of five major animal categories as percentages of total NISP by level and phase; (b) relative frequency of hare, fish (carp species), tortoise and turtle, hedgehog, and birds within the small game fraction; (c) relative frequency of aurochs, wild boar, various deer species (red, roe and rarely fallow deer), and equines (wild horse and onager) among the non-caprine ungulate remains.

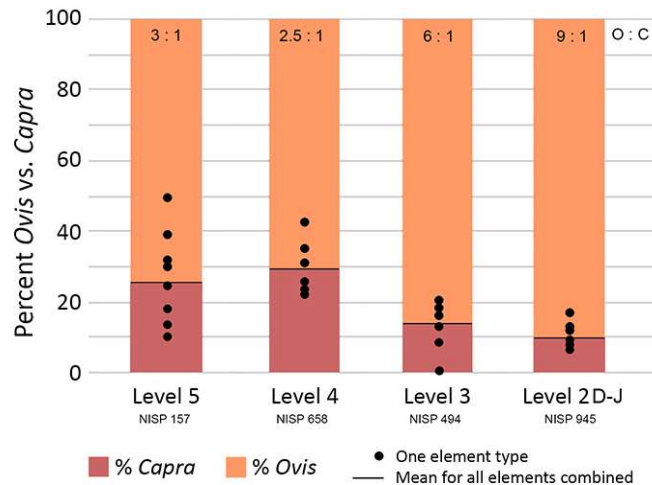

**Figure S2.** The relative representation of *Ovis* and *Capra* by level in AH based on morphologically diagnostic elements (NISP). Bars reflect the mean difference in the percentages of sheep versus goat for eight diagnostic elements; dots represent percentage values by element type. Only specimens for which genus could be defined with confidence are included. NISP values are appropriate for the comparison since fragmentation is essentially equivalent between the two taxa. (O:C) ratio based on percent *Ovis* vs. percent *Capra*.

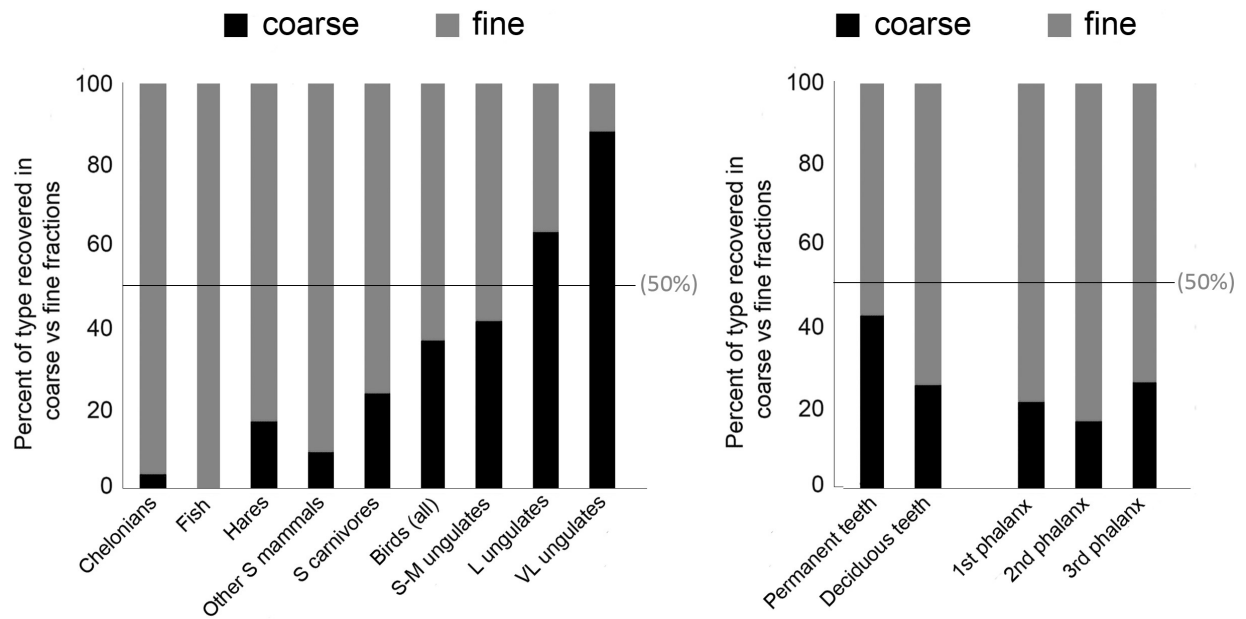

**Figure S3.** Contrasting taxonomic and body part yields from the “coarse” and “fine” recovery fractions from AH. Fine fraction material is recovered using a combination of 4 mm and 2 mm dry sieve meshes plus flotation. The 50% line represents parity (no recovery bias) between coarse and fine fractions. (S) small; (M) medium; (L) large; (VL) very large.

**Table S3.** Summary data on pelvic (pubis-acetabulum) fusion state and sex determination for caprine specimens from the post-2009 excavations at AH.

|            | Total specimens sexed | Fusion state     | Female MNE | Females in each cohort | Male MNE | Males in each cohort |
|------------|-----------------------|------------------|------------|------------------------|----------|----------------------|
| Level 2J-D | MNE = 57              | unfused<br>fused | 6<br>25    | 19 %<br>81 %           | 4<br>22  | 15 %<br>85 %         |
| Level 3    | MNE = 36              | unfused<br>fused | 2<br>12    | 14 %<br>86 %           | 13<br>9  | 59 %<br>41 %         |
| Level 4    | MNE = 52              | unfused<br>fused | 3<br>25    | 11 %<br>89 %           | 14<br>10 | 58 %<br>42 %         |
| Level 5    | MNE = 21              | unfused<br>fused | 1<br>6     | 14 %<br>86 %           | 9<br>5   | 64 %<br>36 %         |

Note: MNE refers to the minimum number of elements. Percent values were calculated separately for each sex. Fused pelvises represent individuals ranging from ca. 7 months of age and older. Data represent only those specimens for which sex could be determined from the morphology of the pubis-acetabulum region of the innominate.

**Table S4.** Caprine mortality patterns from the post-2009 excavations at AH, using Grant's (1) age-scoring codes for (a) eight age cohorts that span the maximum potential lifespan based on the dP<sub>4</sub>-P<sub>4</sub> dental sequence, and (b) a more detailed set of short-interval cohorts that span the first two years of life based on deciduous lower 4<sup>th</sup> premolar (dP<sub>4</sub>). Unworn dP<sub>4</sub> elements were included only if the crown was well developed in comparison to a newborn (full-term) comparative skeleton.

a. Eight cohorts spanning the maximum potential lifespan based on the dP<sub>4</sub>-P<sub>4</sub> dental sequence:

| Level | dP <sub>4</sub> (a-e) | dP <sub>4</sub> (f-n) | P <sub>4</sub> (-) | P <sub>4</sub> (e) | P <sub>4</sub> (f-g) | P <sub>4</sub> (h-j) | P <sub>4</sub> (k-l) | P <sub>4</sub> (m-n) | Total MNE |
|-------|-----------------------|-----------------------|--------------------|--------------------|----------------------|----------------------|----------------------|----------------------|-----------|
| 2J-I  | 0                     | 6                     | 0                  | 1                  | 9                    | 7                    | 2                    | 1                    | 26        |
| 3     | 1                     | 11                    | 1                  | 6                  | 16                   | 8                    | 3                    | 0                    | 46        |
| 4     | 5                     | 42                    | 3                  | 4                  | 15                   | 16                   | 7                    | 0                    | 92        |
| 5     | 2                     | 8                     | 0                  | 1                  | 1                    | 0                    | 2                    | 0                    | 14        |

b. Short-interval cohorts within the first two years of life only, based on development and wear of the deciduous lower 4<sup>th</sup> premolar (dP<sub>4</sub>):

| Level | dP <sub>4</sub> (a) | dP <sub>4</sub> (b-c) | dP <sub>4</sub> (d-e) | dP <sub>4</sub> (f-g) | dP <sub>4</sub> (h-j) | dP <sub>4</sub> (k-l) | dP <sub>4</sub> (m-n) | Total MNE |
|-------|---------------------|-----------------------|-----------------------|-----------------------|-----------------------|-----------------------|-----------------------|-----------|
| 2J-I  | 0                   | 0                     | 0                     | 1                     | 2                     | 1                     | 2                     | 6         |
| 3     | 0                   | 0                     | 1                     | 4                     | 4                     | 2                     | 1                     | 12        |
| 4     | 2                   | 1                     | 2                     | 20                    | 5                     | 10                    | 7                     | 47        |
| 5     | 0                   | 0                     | 2                     | 4                     | 0                     | 0                     | 4                     | 10        |

Notes: MNE counts combine right and left sides.

**Table S5.** AH and comparison mortality data according to the (a) JSA (juvenile-subadult-adult) three-cohort system and (b) JPO (juvenile-prime adult-old adult) three-cohort system by geographic region, based on the dP4-P4 dental sequence.

a. JSA SYSTEM:

| Culture Period | Region       | Site            | Level/ Layer/Phase            | Taxon                 | total MNE | % juvenile | % subadult | % adult | Source                                |
|----------------|--------------|-----------------|-------------------------------|-----------------------|-----------|------------|------------|---------|---------------------------------------|
| Early PPN      | Anatolia     | Aşıklı          | 2I-J                          | <i>Ovis</i> +         | 26        | 23         | 4          | 73      | this study                            |
| Early PPN      | Anatolia     | Aşıklı          | 3                             | <i>Ovis</i> +         | 46        | 26         | 15         | 59      | this study                            |
| Early PPN      | Anatolia     | Aşıklı          | 4                             | <i>Ovis</i> +         | 92        | 51         | 8          | 41      | this study                            |
| Early PPN      | Anatolia     | Aşıklı          | 5                             | <i>Ovis</i> +         | 14        | 71         | 7          | 21      | this study                            |
| Early PPN      | Cyprus       | Shillourokambos | (Sa) Ancienne A1-C            | <i>Ovis+Capra</i>     | 47        | 21         | 13         | 66      | Vigne et al. (2); Guilaine et al. (3) |
| Early PPN      | Cyprus       | Shillourokambos | (Sm) Moyenne A1-B             | <i>Ovis+Capra</i>     | 56        | 34         | 12         | 54      | Vigne et al. (2); Guilaine et al. (3) |
| PPN            | Cyprus       | Shillourokambos | (Sr) Recente                  | <i>Ovis+Capra</i>     | 15        | 20         | 13         | 67      | Vigne et al. (2); Guilaine et al. (3) |
| PPN            | Anatolia     | Gritille        | Late PPNB, phase B            | <i>Ovis+</i>          | 40        | 63         | 2          | 35      | Stein (4)                             |
| PN             | Aeg. Greece  | Franchthi       | (Fi) FN                       | <i>Ovis+Capra</i>     | 31        | 65         | 6          | 29      | Munro & Stiner (5)                    |
| PN             | Aeg. Greece  | Franchthi       | (Fi) LN                       | <i>Ovis+Capra</i>     | 41        | 66         | 2          | 32      | Munro & Stiner (5)                    |
| PN             | Aeg. Greece  | Franchthi       | (Fm) MN                       | <i>Ovis+Capra</i>     | 46        | 59         | 6          | 35      | Munro & Stiner (5)                    |
| PN             | Aeg. Greece  | Franchthi       | (Fe) EN                       | <i>Ovis+Capra</i>     | 17        | 82         | 6          | 12      | Munro & Stiner (5)                    |
| PN             | Aeg. Greece  | Franchthi       | (Fi) IN                       | <i>Ovis+Capra</i>     | 29        | 93         | 0          | 7       | Munro & Stiner (5)                    |
| PN             | Anatolia     | Erbaba          | all                           | <i>Ovis+Capra</i>     | 216       | 75         | 13         | 12      | Arbuckle (6)                          |
| PN             | Anatolia     | Köşk            | II-V                          | <i>Ovis+Capra</i>     | 328       | 64         | 11         | 25      | Arbuckle (7)                          |
| PN             | Anatolia     | Çatalhöyük      | (C1) PN North/<br>BACH/Summit | <i>Ovis+</i>          | 10        | 70         | 0          | 30      | Russell & Martin (8)                  |
| PN             | Anatolia     | Çatalhöyük      | (C2) South XII-VII            | <i>Ovis+</i>          | 28        | 54         | 25         | 21      | Russell & Martin (8)                  |
| PN             | Anatolia     | Çatalhöyük      | (C3) South pre-XII            | <i>Ovis+</i>          | 23        | 74         | 4          | 22      | Russell & Martin (8)                  |
| PN             | Anatolia     | Ulucak          | (Uiv) IV                      | <i>Ovis+Capra</i>     | 30        | 37         | 13         | 50      | Çarkırlar (9)                         |
| PN             | Anatolia     | Ulucak          | (Uvl) V late                  | <i>Ovis+Capra</i>     | 33        | 70         | 12         | 18      | Çarkırlar (9)                         |
| PN             | Anatolia     | Ulucak          | (Uve) V early                 | <i>Ovis+Capra</i>     | 29        | 52         | 3          | 45      | Çarkırlar (9)                         |
| PN             | Anatolia     | Ulucak          | (Uvi) VI                      | <i>Ovis+Capra</i>     | 26        | 50         | 4          | 46      | Çarkırlar (9)                         |
| Epi            | Anatolia (M) | Karain B        | 1                             | <i>Ovis</i> +         | 93        | 41         | 30         | 29      | Atıcı (10)                            |
| Epi            | Anatolia (M) | Karain B        | 2                             | <i>Ovis</i> +         | 46        | 41         | 33         | 26      | Atıcı (10)                            |
| Epi            | Anatolia (M) | Öktüzini        | 2                             | <i>Ovis</i> +         | 85        | 35         | 38         | 27      | Atıcı (10)                            |
| Epi            | Anatolia (M) | Öktüzini        | 3                             | <i>Ovis</i> +         | 40        | 48         | 25         | 28      | Atıcı (10)                            |
| UP             | Hatay (NL)   | Üçağızlı I      | B-B3                          | <i>C. capreolus</i>   | 24        | 17         | 71         | 12      | Stiner (11)                           |
| UP             | Hatay (NL)   | Üçağızlı I      | F-I                           | <i>C. capreolus</i>   | 26        | 42         | 58         | 0       | Stiner (11)                           |
| UP             | Hatay (NL)   | Üçağızlı I      | F-I                           | <i>Capra aegagrus</i> | 54        | 26         | 17         | 57      | Stiner (11)                           |
| MP             | Hatay (NL)   | Üçağızlı II     | B2                            | <i>C. capreolus</i>   | 15        | 7          | 60         | 33      | Stiner (11)                           |
| MP             | Hatay (NL)   | Üçağızlı II     | all                           | <i>Capra aegagrus</i> | 35        | 26         | 23         | 51      | Stiner (11)                           |
| Epi            | Israel (SL)  | Hayonim Cave    | all                           | <i>G. gazella</i>     | 11        | 45         | 28         | 27      | Stiner (12)                           |
| Epi-Natuf      | Israel (SL)  | Hayonim Cave    | all                           | <i>G. gazella</i>     | 19        | 47         | 32         | 21      | Munro data, in (12)                   |
| Epi-Natuf      | Israel (SL)  | Hayonim Terrace | all                           | <i>G. gazella</i>     | 28        | 46         | 50         | 4       | Munro data, in (12)                   |

Notes: (*Ovis*+) Mostly sheep but some goats also present; (ePPN) early Pre-Pottery Neolithic; (Epi) Epipaleolithic; (MP) Middle Paleolithic; (UP) Upper Paleolithic. (Epi-Natuf) Natufian is a late Epipaleolithic plant-cultivating culture. Geographic symbols: (NL) Northern Levant; (SL) Southern Levant; (M) Mediterranean. Whereas caprine mortality data are emphasized in this study, comparison data on mountain gazelles (*Gazella gazella*) and roe deer (*Capreolus capreolus*) are included from earlier periods.

Table S5, continued.

b. JPO SYSTEM:

| Culture Period | Region       | Site            | Level/ Layer/Phase         | Taxon                   | total MNE | % juvenile | % prime adult | % old adult | Source                                |
|----------------|--------------|-----------------|----------------------------|-------------------------|-----------|------------|---------------|-------------|---------------------------------------|
| Early PPN      | Anatolia     | Aşıklı          | 2I-J                       | <i>Ovis</i> +           | 26        | 23         | 65            | 12          | this study                            |
| Early PPN      | Anatolia     | Aşıklı          | 3                          | <i>Ovis</i> +           | 46        | 26         | 67            | 7           | this study                            |
| Early PPN      | Anatolia     | Aşıklı          | 4                          | <i>Ovis</i> +           | 92        | 51         | 41            | 8           | this study                            |
| Early PPN      | Anatolia     | Aşıklı          | 5                          | <i>Ovis</i> +           | 14        | 71         | 15            | 14          | this study                            |
| Early PPN      | Cyprus       | Shillourokambos | (Sa) Ancienne A1-C         | <i>Ovis+Capra</i>       | 47        | 21         | 66            | 13          | Vigne et al. (2); Guilaine et al. (3) |
| Early PPN      | Cyprus       | Shillourokambos | (Sm) Moyenne A1-B          | <i>Ovis+Capra</i>       | 56        | 34         | 52            | 14          | Vigne et al. (2); Guilaine et al. (3) |
| PPN            | Cyprus       | Shillourokambos | (Sr) Recente               | <i>Ovis+Capra</i>       | 15        | 20         | 73            | 7           | Vigne et al. (2); Guilaine et al. (3) |
| PPN            | Anatolia     | Gritille        | Late PPNB, phase B         | <i>Ovis</i> +           | 40        | 62         | 38            | 0           | Stein (4)                             |
| PN             | Aeg. Greece  | Franchthi       | (Ff) FN                    | <i>Ovis+Capra</i>       | 31        | 65         | 22            | 13          | Munro & Stiner (5)                    |
| PN             | Aeg. Greece  | Franchthi       | (Fi) LN                    | <i>Ovis+Capra</i>       | 41        | 66         | 24            | 10          | Munro & Stiner (5)                    |
| PN             | Aeg. Greece  | Franchthi       | (Fm) MN                    | <i>Ovis+Capra</i>       | 46        | 59         | 39            | 2           | Munro & Stiner (5)                    |
| PN             | Aeg. Greece  | Franchthi       | (Fe) EN                    | <i>Ovis+Capra</i>       | 17        | 82         | 18            | 0           | Munro & Stiner (5)                    |
| PN             | Aeg. Greece  | Franchthi       | (Fi) IN                    | <i>Ovis+Capra</i>       | 29        | 93         | 7             | 0           | Munro & Stiner (5)                    |
| PN             | Anatolia     | Erbaba          | all                        | <i>Ovis+Capra</i>       | 216       | 75         | 23            | 2           | Arbuckle (6)                          |
| PN             | Anatolia     | Köşk            | II-V                       | <i>Ovis+Capra</i>       | 328       | 64         | 30            | 5           | Arbuckle (7)                          |
| PN             | Anatolia     | Çatalhöyük      | (C1) PN North/ BACH/Summit | <i>Ovis</i> +           | 10        | 70         | 30            | 0           | Russell & Martin (8)                  |
| PN             | Anatolia     | Çatalhöyük      | (C2) South XII-VII         | <i>Ovis</i> +           | 28        | 54         | 46            | 0           | Russell & Martin (8)                  |
| PN             | Anatolia     | Çatalhöyük      | (C3) South pre-XII         | <i>Ovis</i> +           | 23        | 74         | 17            | 9           | Russell & Martin (8)                  |
| PN             | Anatolia     | Ulucak          | (Uiv) IV                   | <i>Ovis+Capra</i>       | 30        | 37         | 60            | 3           | Çarkırlar (9)                         |
| PN             | Anatolia     | Ulucak          | (Uvl) V late               | <i>Ovis+Capra</i>       | 33        | 70         | 27            | 3           | Çarkırlar (9)                         |
| PN             | Anatolia     | Ulucak          | (Uve) V early              | <i>Ovis+Capra</i>       | 29        | 52         | 41            | 7           | Çarkırlar (9)                         |
| PN             | Anatolia     | Ulucak          | (Uvi) VI                   | <i>Ovis+Capra</i>       | 26        | 50         | 46            | 4           | Çarkırlar (9)                         |
| Epi            | Anatolia (M) | Hallan Çemi     | all                        | <i>Ovis+Capra</i>       | 24        | 21         | 71            | 8           | Starkovich & Stiner (13)              |
| Epi            | Anatolia (M) | Karain 1        | 1                          | <i>Ovis</i> +           | 93        | 41         | 57            | 2           | Atıcı (10)                            |
| Epi            | Anatolia (M) | Karain 2        | 2                          | <i>Ovis</i> +           | 46        | 41         | 57            | 2           | Atıcı (10)                            |
| Epi            | Anatolia (M) | Öküzini 2       | 2                          | <i>Ovis</i> +           | 85        | 35         | 61            | 4           | Atıcı (10)                            |
| Epi            | Anatolia (M) | Öküzini 3       | 3                          | <i>Ovis</i> +           | 40        | 48         | 50            | 2           | Atıcı (10)                            |
| Epi            | Anatolia     | Derikli Cave    | na                         | <i>Capra aegagrus</i>   | ?         | 45         | 44            | 11          | Arbuckle & Ereğ (14)                  |
| UP             | Hatay (NL)   | Üçağızlı I      | B-B3                       | <i>C. capreolus</i> .   | 24        | 17         | 75            | 8           | Stiner (11)                           |
| UP             | Hatay (NL)   | Üçağızlı I      | F-I                        | <i>C. capreolus</i>     | 26        | 42         | 58            | 0           | Stiner (11)                           |
| UP             | Hatay (NL)   | Üçağızlı I      | F-I                        | <i>Capra aegagrus</i> . | 54        | 26         | 63            | 11          | Stiner (11)                           |
| MP             | Hatay (NL)   | Üçağızlı II     | B2                         | <i>C. capreolus</i>     | 15        | 7          | 80            | 13          | Stiner (11)                           |
| MP             | Hatay (NL)   | Üçağızlı II     | all                        | <i>Capra aegagrus</i>   | 35        | 26         | 68            | 6           | Stiner (11)                           |
| Epi-Natuf      | Israel (SL)  | Hayonim Terrace | all                        | <i>G. gazella</i>       | 28        | 46         | 22            | 32          | Munro data, in (12)                   |
| Epi-Natuf      | Israel (SL)  | Hayonim Cave    | all                        | <i>G. gazella</i>       | 19        | 47         | 26            | 26          | Munro data, in (12)                   |
| Epi            | Israel (SL)  | Hayonim Cave    | all                        | <i>G. gazella</i>       | 11        | 45         | 55            | 0           | Stiner (12)                           |
| UP             | Israel (SL)  | Kebara Cave     | all                        | <i>G. gazella</i>       | 85        | 46         | 46            | 8           | Speth & Tchernov (15)                 |
| MP             | Israel (SL)  | Kebara Cave     | all                        | <i>G. gazella</i>       | 316       | 30         | 62            | 8           | Speth & Tchernov (15)                 |
| MP             | Israel (SL)  | Hayonim Cave    | all                        | <i>G. gazella</i>       | 20        | 25         | 70            | 5           | Stiner (12)                           |
| Epi            | Lebanon (NL) | Ksar 'Akil      | I-V                        | <i>Capra aegagrus</i>   | 43        | 14         | 56            | 30          | Kersten (16)                          |
| Epi            | Italy (M)    | Grotta Polesini | all                        | <i>C. capreolus</i>     | 202       | 21         | 66            | 13          | Stiner (17)                           |
| Epi            | Italy (M)    | Grotta Polesini | all                        | <i>R. rupicapra</i>     | 79        | 48         | 27            | 25          | Stiner (17)                           |



|     |           |                 |      |                   |    |    |    |    |             |
|-----|-----------|-----------------|------|-------------------|----|----|----|----|-------------|
| Epi | Italy (M) | Grotta Polesini | all  | <i>Capra ibex</i> | 13 | 0  | 85 | 15 | Stiner (17) |
| UP  | Italy (M) | Riparo Mochi    | C-D  | <i>Capra ibex</i> | 11 | 36 | 64 | 0  | Stiner (17) |
| MP  | Italy (M) | Grotta Breuil   | Br   | <i>Capra ibex</i> | 16 | 37 | 26 | 37 | Stiner (17) |
| MP  | Italy (M) | Grotta Breuil   | B3/4 | <i>Capra ibex</i> | 30 | 0  | 87 | 13 | Stiner (17) |

Notes: (*Ovis+*) Mostly sheep but some goats also present; (ePPN) early Pre-Pottery Neolithic; (Epi) Epipaleolithic; (MP) Middle Paleolithic; (UP) Upper Paleolithic. (Epi-Natuf) Natufian is a late Epipaleolithic culture that harvested wild cereals. Geographic symbols: (NL) Northern Levant; (SL) Southern Levant; (M) Mediterranean. Whereas caprine mortality data are emphasized in this study, comparison data on mountain gazelles (*Gazella gazella*) and roe deer (*Capreolus capreolus*) are included from earlier periods.

**Table S6.** Time frames for key Neolithic sites.

| Site                               | Time range, cal BC | Sources ( <sup>14</sup> C)                 |
|------------------------------------|--------------------|--------------------------------------------|
| Franchthi Cave (Initial-Late)      | 6800 – 3200        | Demoule & Perlès (18); Perlès et al. (19)  |
| Köşk Höyük (V-II)                  | 6300 – 5500        | Arbuckle (7)                               |
| Erbaba                             | 6500 – 6000        | Arbuckle (6)                               |
| Gritille (phase B)                 | 6800 – 6400        | Stein (4)                                  |
| Ulucak (VI-IV)                     | 7000 – 5700        | Çarkırlar (9)                              |
| Çatalhöyük (pre-XII-VII and later) | 7150 – 5900        | Marciniak et al. (20); Bayliss et al. (21) |
| Shillourokambos (ancienne-recente) | 8400 – 7000        | Vigne et al. (2); Guilaine et al. (3)      |
| Aşıklı Höyük, Level 2 (J-A)        | 7750 – 7300        | Quade et al. (22)                          |
| Aşıklı Höyük, Level 3              | 8000 – 7700        | Quade et al. (22)                          |
| Aşıklı Höyük, Levels 5-4           | 8400 – 8000        | Quade et al. (22)                          |

**Table S7.** Dental data for AH caprines from the old excavations based on Grant's (1) age-scoring codes by phase groups within Level 2, divided into eight age cohorts.

| Level 2 phases | dP <sub>4</sub><br>(a-e) | dP <sub>4</sub><br>(f-n) | P <sub>4</sub><br>(b-c) | P <sub>4</sub><br>(d-e) | P <sub>4</sub><br>(f-g) | P <sub>4</sub><br>(h-j) | P <sub>4</sub><br>(k-l) | P <sub>4</sub><br>(m-n) | Total MNE |
|----------------|--------------------------|--------------------------|-------------------------|-------------------------|-------------------------|-------------------------|-------------------------|-------------------------|-----------|
| 2SPB           | 0                        | 11                       | 0                       | 1                       | 7                       | 0                       | 0                       | 0                       | 19        |
| 2C-A           | 2                        | 30                       | 1                       | 13                      | 62                      | 21                      | 1                       | 0                       | 130       |
| 2F-D           | 2                        | 35                       | 1                       | 20                      | 77                      | 13                      | 1                       | 0                       | 149       |
| 2H-G           | 5                        | 30                       | 0                       | 27                      | 34                      | 5                       | 1                       | 0                       | 102       |
| 2J-I           | 2                        | 27                       | 0                       | 23                      | 27                      | 5                       | 0                       | 0                       | 84        |

Note: (SPB) Special Purpose Building area on south area of mound, coeval with Level 2C-A.

**Table S8.** Age structures for AH caprines from the old excavations by phase group within Level 2, divided into three-cohorts in the (a) JSA and (b) JPO systems, respectively.

a. JSA (Juvenile-Subadult-Adult) System:

| Level 2 phases | %<br>Juvenile | %<br>Subadult | %<br>Adult | Total MNE |
|----------------|---------------|---------------|------------|-----------|
| 2SPB           | 58            | 05            | 37         | 19        |
| 2C-A           | 25            | 11            | 65         | 130       |
| 2F-D           | 25            | 14            | 61         | 149       |
| 2H-G           | 34            | 26            | 39         | 102       |
| 2J-I           | 35            | 27            | 38         | 84        |

b. JPO (Juvenile-Prime Adult-Old Adult) System:

| Level 2 phases | %<br>Juvenile | %<br>Prime adult | %<br>Old adult | Total MNE |
|----------------|---------------|------------------|----------------|-----------|
| 2SPB           | 58            | 42               | 0              | 19        |
| 2C-A           | 25            | 75               | 1              | 130       |
| 2F-D           | 25            | 74               | 1              | 149       |
| 2H-G           | 34            | 65               | 1              | 102       |
| 2J-I           | 35            | 65               | 0              | 84        |

Note: (SPB) Special Purpose Building area on south area of mound, coeval with Level 2C-A.

## **SI Background on pelvic morphology and fusion for sexing young caprines**

We used a visual method for separating young female and male caprines that relies on morphological characteristics of the complexly shaped pubis-acetabulum zone of the pelvis (23). The method is not error-proof but is arguably the most appropriate for our purposes. The pelvis is one of the few elements that can be sexed in young caprines. Our goal was to capture sex ratio information in individuals less than 1 year of age at the time of death. At AH and the sister site of Musular, only about 15% of the specimens that could be sexed on morphological criteria could also be measured due to breakage. However, other studies indicate that pelvis character data are as reliable, if not more reliable, than measurement data for this purpose.

Greenfield (24) has evaluated the potential of sexing caprines from pelvises, including relatively young specimens, on the basis of both character data and measurement data. He notes some ambiguity in the use of characters to sex the acetabulum, but significant character differences clearly exist between males and females from a relatively young age. His tabulated measurement data show similar levels of ambiguity as do the character data; most of the measurement data fit a clear pattern but some large female measurements fall within the male range and small males fall within the female range. Greenfield used a multiple-age sample in his measurement study, and the number of young animals examined was small. It therefore is impossible to know if the dimorphism he observed in the measurement data for the younger age groups was statistically significant. Importantly, similar degrees of ambiguity were found in character data and measurement data in that study. While males and females can be reliably separated using character or measurement data in most cases, one must recognize that exceptions are not uncommon.

A study by Prummel and Frisch (23) also concludes that the complexly shaped morphological features of the pelvis can be distinguished using characters, and that this approach may be preferable to measurements for sexing animals less than one year of age. There are two reasons for this: (a) young individuals do not yet show statistically observable sexual *size* dimorphism (see also 25), but they do differ in shape; and (b) young individuals experience rapid growth spurts that result in wide, overlapping size ranges between males and females in this age group. We conclude that character traits which focus on shape are probably as reliable, if not more reliable, than measurement data for distinguishing the sexes from pelvic bones in young caprines.

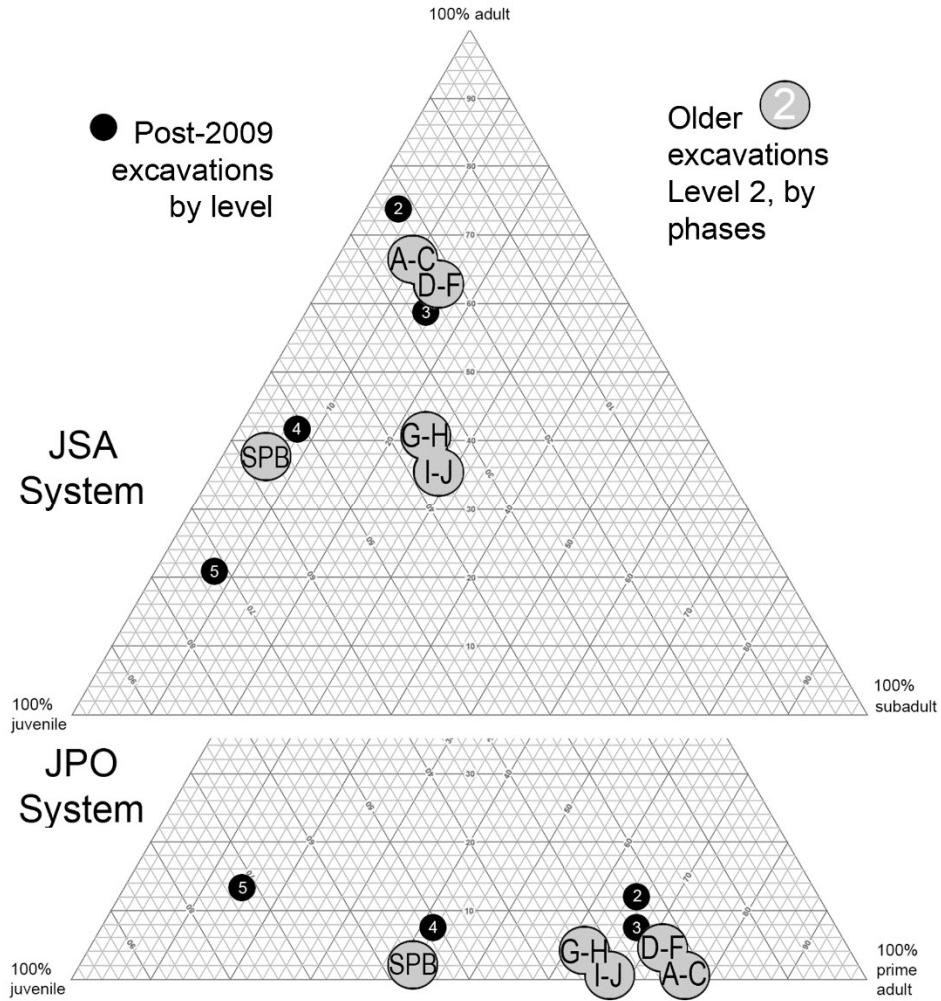

**Figure S4.** Tri-polar comparison of AH caprine mortality patterns from successive phases of Level 2, using data from the old excavation (sub-optimal recovery), and the post-2009 (full recovery) excavations from all levels. The sample from the Special Purpose Building (SPB) area on the southern end of the mound is coeval with phases 2A-C in the residential areas.

## SI Background and results on caprine body size variation

Linear osteometric measurements of bone elements were used to track variation in caprine body mass/size (26) using the Logarithmic Size Index (LSI; 27-28). Wild females of *Ovis* and *Capra* from the Cilician mountains of southern Turkey serve as recent reference individuals for the comparisons. LSI is calculated as  $\log(x/m)$ , where  $x$  is the measurement of the archaeological bone, and  $m$  is the equivalent measurement from the reference animal. The LSI values were examined statistically using mixture analysis with the PAST program (29).

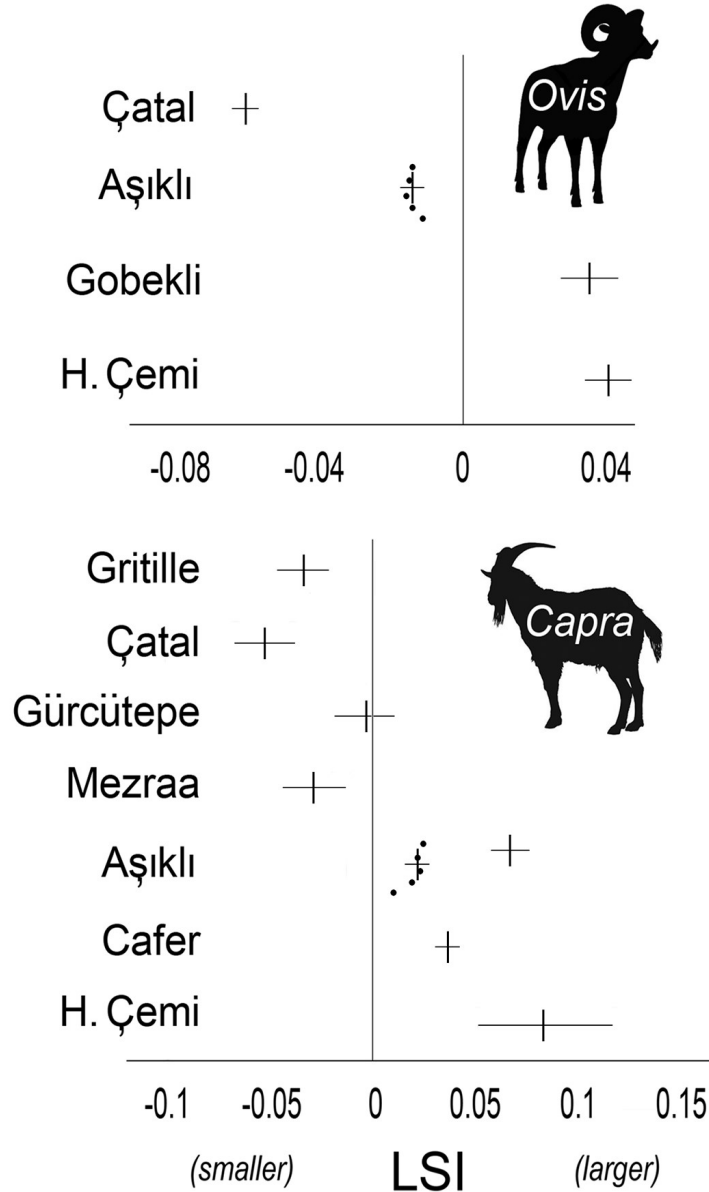

**Figure S5.** Size variation in sheep and in goats from time-ordered Anatolian Neolithic sites (Halan Çemi is the oldest) based on LSI. Large crosses are mean LSI values and standard error by site for each species; small circles are mean LSI values by successive levels and phases (Levels 4 through 2C-A) within the AH series. See Tables S9-S10 for more information. Results from (26).

**Table S9.** Logarithmic Size Index statistics (LSI) for *Ovis* by phase groups in Levels 4 through 2 at AH and for comparison assemblages from other sites (26).

a. *Ovis* LSI statistics by layer in AH and for other sites:

| Site/phase group       | N    | Mean   | stand error | median | sd    |
|------------------------|------|--------|-------------|--------|-------|
| Aşıklı Höyük series:   |      |        |             |        |       |
| AH 4                   | 176  | -0.011 | 0.002       | -0.01  | 0.031 |
| AH 3E-C                | 171  | -0.015 | 0.002       | -0.015 | 0.032 |
| AH 3B-2H               | 1017 | -0.017 | 0.001       | -0.014 | 0.036 |
| AH 2G-D                | 1472 | -0.016 | 0.001       | -0.015 | 0.034 |
| AH 2C-A                | 1072 | -0.015 | 0.001       | -0.014 | 0.032 |
| Inter-site comparison: |      |        |             |        |       |
| Hallan Çemi            | 390  | 0.042  | 0.003       | 0.038  | 0.05  |
| Göbekli                | 50   | 0.036  | 0.004       | 0.035  | 0.03  |
| AH (all levels)        | 3909 | -0.016 | 0.001       | -0.01  | 0.034 |
| Çatalhöyük             | 230  | -0.06  | 0.002       | -0.064 | 0.037 |

Note: Hallan Çemi is the earliest assemblage (terminal Pleistocene) and Çatalhöyük the youngest.

b. *Ovis* LSI T-test results between level/phase group pairs at AH:

|                 | L4-3E vs 3C | 3E-C vs 3B2-H | 3B-2H vs 2G-D | 2G-D vs 2C-A |
|-----------------|-------------|---------------|---------------|--------------|
| DF              | 344         | 42            | 54            | 50           |
| T-value         | 1.02676357  | -2.121        | -1.022        | 0.194        |
| P(T<=t) 2-sided | 0.305       | 0.040         | 0.311         | 0.847        |

Notes: The AH osteometric data combine samples from the old and the post-2009 excavations.

**Table S10.** Logarithmic Size Index statistics (LSI) for *Capra* by phase groups in Levels 4 through 2 at AH and for comparison assemblages from other sites (26).

a. *Capra* LSI statistics by layer in AH and for other sites:

| Site/phase             | N   | Mean   | stand error | median | sd    |
|------------------------|-----|--------|-------------|--------|-------|
| Aşıklı Höyük series:   |     |        |             |        |       |
| AH 4                   | 67  | 0.01   | 0.005       | 0      | 0.045 |
| AH 3E-C                | 34  | 0.021  | 0.007       | 0.02   | 0.043 |
| AH 3B-2H               | 174 | 0.024  | 0.003       | 0.02   | 0.042 |
| AH 2G-D                | 297 | 0.023  | 0.003       | 0.02   | 0.044 |
| AH 2C-A                | 254 | 0.027  | 0.003       | 0.03   | 0.046 |
| Inter-site comparison: |     |        |             |        |       |
| Hallan Çemi            | 5   | 0.087  | 0.017       | 0.095  | 0.039 |
| Çafer                  | 180 | 0.038  | 0.003       | 0.043  | 0.044 |
| AH (all levels)        | 826 | 0.023  | 0.002       | 0.02   | 0.045 |
| Mezraa PPNB            | 33  | -0.03  | 0.008       | -0.034 | 0.045 |
| Gürcütepe              | 59  | -0.004 | 0.007       | -0.014 | 0.056 |
| Çatalhöyük             | 24  | -0.054 | 0.007       | -0.055 | 0.033 |
| Gritille               | 55  | -0.035 | 0.006       | -0.043 | 0.047 |

Note: Hallan Çemi is the earliest assemblage (terminal Pleistocene) and Gritille the youngest.

b. *Capra* LSI T-test results between level/phase group pairs at AH:

|                | AH4-3E vs 3C | 3E-3C vs 3B-2H | 3B-2H vs 2G-2D | 2G-2D vs 2C-2A |
|----------------|--------------|----------------|----------------|----------------|
| DF             | 68           | 46             | 374            | 526            |
| T-value        | -1.165       | -0.395         | 0.370          | -1.076         |
| P(T<t) 2-sided | 0.248        | 0.695          | 0.712          | 0.283          |

Notes: The AH osteometric data combine samples from the old and the post-2009 excavations.

## SI References

1. A. Grant, “The use of tooth wear as a guide to the age of domestic animals” in *Ageing and Sexing Animal Bones from Archaeological Sites*, B. Wilson, C. Grigson, S. Payne, Eds. (British Archaeological Reports, Oxford, 1982), pp. 91-108.
2. J.-D. Vigne, I. Carrère, F. Briois, J. Guilaine, The early process of mammal domestication in the Near East: New evidence from the Pre-Neolithic and Pre-Pottery Neolithic in Cyprus. *Curr Anthropol* 52, S255-S271 (2011).
3. J. Guilaine, F. Briois, J.-D. Vigne, Eds., Shillourokambos: Un établissement néolithique pré-céramique à Chypre les fouilles du secteur 3. (CNRS Éditions, 2021).
4. G. J. Stein, “Strategies of risk reduction in herding and hunting systems of Neolithic southeast Anatolia” in *Early Animal Domestication and Its Cultural Context*, P. Crabtree, D. Campana, K. Ryan, Eds. (MASCA, University Museum of Archaeology and Anthropology, Univ. of Pennsylvania, 1989), pp. 87-97.
5. N. D. Munro, M. C. Stiner, A zooarchaeological history of the Neolithic occupations at Franchthi Cave and Paralia in southern Greece. *J Anthropol Arch* 58, 101162 (2020). <https://doi.org/10.1016/j.jaa.2020.101162>
6. B. S. Arbuckle, “Caprine exploitation at Erbaba Höyük: A Pottery Neolithic village in Central Anatolia” in *Archéozoologie de l'Asie du Sud-Ouest et des régions adjacentes. (Maison de l'Orient et de la Méditerranée, 49, Lyon, 2008b)*, pp. 345-365.
7. B. S. Arbuckle, Zooarchaeology at Köşk Höyük. *Kazı Sonuçları Toplantısı* 27, 124-136 (2008a).
8. N. Russell, L. Martin, “The Çatalhöyük mammal remains” in *Inhabiting Çatalhöyük: Reports from the 1995-99 seasons*, I. Hodder Ed. (McDonald Institute for Archaeological Research, Cambridge, 2005), pp. 33-98.
9. C. Çakırlar, The evolution of animal husbandry in Neolithic central-west Anatolia: The zooarchaeological record from Ulucak Höyük (c. 7040-5660 cal. BC, Izmir, Turkey). *Anatolian Studies* 62, 1-33 (2012).
10. L. Atıcı, Implications of age structures for Epipaleolithic hunting strategies in the Western Taurus Mountains, southwest Turkey. *Anthropozoologica* 44, 13-39 (2009).
11. M. C. Stiner, An unshakeable Middle Paleolithic? Trends versus conservatism in the predatory niche and their social ramifications. *Curr Anthropol* 54, S288-S304 (2013).
12. M. C. Stiner, *The Faunas of Hayonim Cave, Israel: A 200,000-Year Record of Paleolithic Diet, Demography, and Society* (Peabody Museum Press, Cambridge, 2005).
13. B. M. Starkovich, M. C. Stiner, Hallan Çemi Tepesi: High-ranked game exploitation alongside intensive seed processing at the Epipaleolithic-Neolithic transition in Southeastern Turkey. *Anthropozoologica* 44, 41-61 (2009).
14. B. S. Arbuckle, C. M. Erek, Late Epipaleolithic hunters of the central Taurus: Faunal remains from Direkli Cave, Kahramanmaraş, Turkey. *Internat J Osteoarchaeol* 22, 694-707 (2010).
15. J. D. Speth, E. Tchernov. 2007. “The Middle Paleolithic occupations at Kebara Cave: A faunal perspective” in *The Middle Paleolithic Archaeology of Kebara Cave, Mount Carmel, Israel, Part 1*, O. Bar-Yosef and L. Meignen, Eds. (Peabody Museum Press, Cambridge, 2007), pp. 165-260.
16. A. M. P. Kersten, Age and sex composition of Epipalaeolithic fallow deer and wild goat from Ksar ‘Akil. *Palaeohistoria* 29, 119–131 (1987).
17. M. C. Stiner, *Honor among Thieves: A Zooarchaeological Study of Neandertal Ecology*. (Princeton University Press, 1994).



18. J.-P. Demoule, C. Perlès, The Greek Neolithic: A new review. *J World Prehist* 7, 355-416 (1993).
19. C. Perlès, A. Quiles, H. Valladas, Early seventh-millennium AMS dates from domestic seeds in the Initial Neolithic at Franchthi Cave (Argolid, Greece). *Antiquity* 87, 1001-1015 (2013).
20. A. Marciniak, M. Z. Barański, A. Bayliss, L. Czerniak, T. Goslar, et al., Fragmenting times: Interpreting a Bayesian chronology for the late Neolithic occupation of Çatalhöyük East, Turkey. *Antiquity* 89, 154-176 (2015).
21. A. Bayliss, F. Brock, S. Farid, I. Hodder, J. Southon, R. E. Taylor, Getting to the bottom of it all: A Bayesian approach to dating the start of Çatalhöyük. *J World Prehist* 28, 1-26 (2015).
22. J. Quade, M. C. Stiner, A. Copeland, A. E. Clark, M. Özbaşaran M, “Summary of carbon-14 dating of the cultural levels of Aşıklı Höyük” in *The Early Settlement of Aşıklı Höyük: Essays in Honor of Ufuk Esin*, M. Özbaşaran, G. Duru, M. C. Stiner, Eds. (Ege Yayınları, Istanbul, 2018), pp. pp. 43-56.
23. W. Prummel, H.-J. Frisch, 1986. A guide to the distinction of species, sex and body side in bones of sheep and goats. *J Archaeol Sci* 13, 567–578 (1986).
24. H. J. Greenfield, “Sexing fragmentary ungulate acetabulae” in *Recent Advances in Ageing and Sexing Animal Bones*, D. Ruscillo Ed. (Oxbow Books, Oxford, 2006), pp. 68-86.
25. M. A. Zeder, A metrical analysis of a collection of modern goats (*Capra hircus aegagrus* and *C. h. hircus*) from Iran and Iraq: Implications for the study of caprine domestication. *J Archaeological Sci* 28(1), 61-79 (2001).
26. H. Buitenhuis, J. Peters, N. Pöllath, M. C. Stiner, N. D. Munro, Ö. Saritaş, “The faunal remains from Level 3 and 2 of Aşıklı Höyük: Evidence for early management practices” in *The Early Settlement of Aşıklı Höyük: Essays in Honor of Ufuk Esin*, (Ege Yayınları, Istanbul, 2018), pp. 281-323.
27. H. P. Uerpmann, Animal bone finds and economic archaeology: A critical study of ‘osteo-archaeological’ method. *World Archaeol* 4, 307-322 (1979).
28. R. H. Meadow, “The use of size index scaling techniques for research on archaeozoological collections from the Middle East” in *Historia animalium ex ossibus: Beiträge zur Paläoanatomie, Archäologie, Ägyptologie, Ethnologie und Geschichte der Tiermedizin*, C. Becker, H. Manhart, J. Peters, J. Schibler, Eds. (Verlag Marie Leidorf, Rahden, 1999), pp. 285-300.
29. Ø. Hammer, D. A. T. Harper, P. D. Ryan, PAST: Paleontological statistics software package for education and data analysis. *Palaeontologica Electronica* 4, 9 (2001).
